# Supplementary material
Source: ML conference proceedings conference paper supplement (https://www.ecva.net/papers/eccv_2020/papers_ECCV/html/123550664_ECCV_2020_paper.php)
Supplement: Supplementary file 1 [file 123550664-supp.pdf]

# Supplementary Material

Omid Poursaeed, Matthew Fisher, Noam Aigerman, and Vladimir G. Kim

<sup>1</sup>Cornell University    <sup>2</sup>Cornell Tech    <sup>3</sup>Adobe Research

We visualize additional random results for single-view reconstruction and auto-encoding in Figure 1.

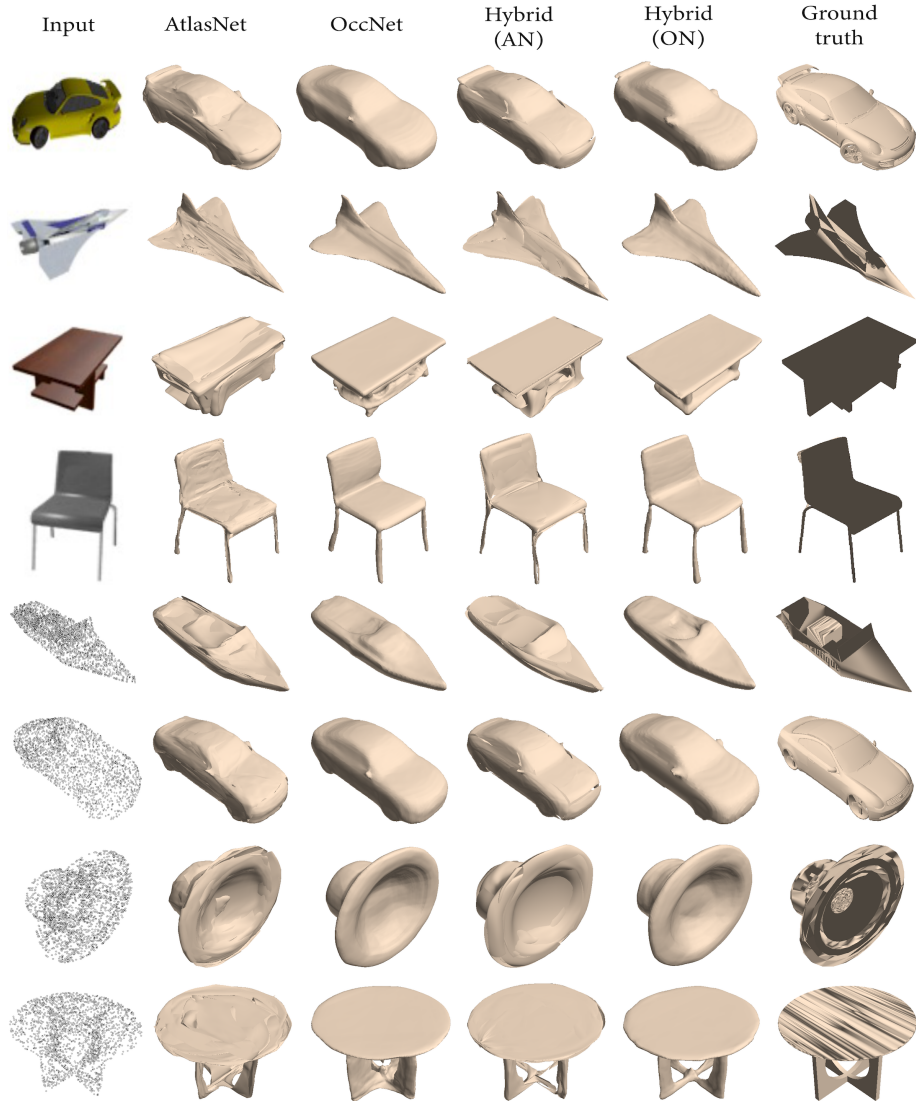

**Fig. 1.** Random results on reconstructing surfaces from images and point clouds.
